# Supplementary material for: The Cysteine-Rich Interdomain Region from the Highly Variable Plasmodium falciparum Erythrocyte Membrane Protein-1 Exhibits a Conserved Structure
Source: PubMed Central journal article supplement (PMC2518858; doi:10.1371/journal.ppat.1000147), 2008-09-05

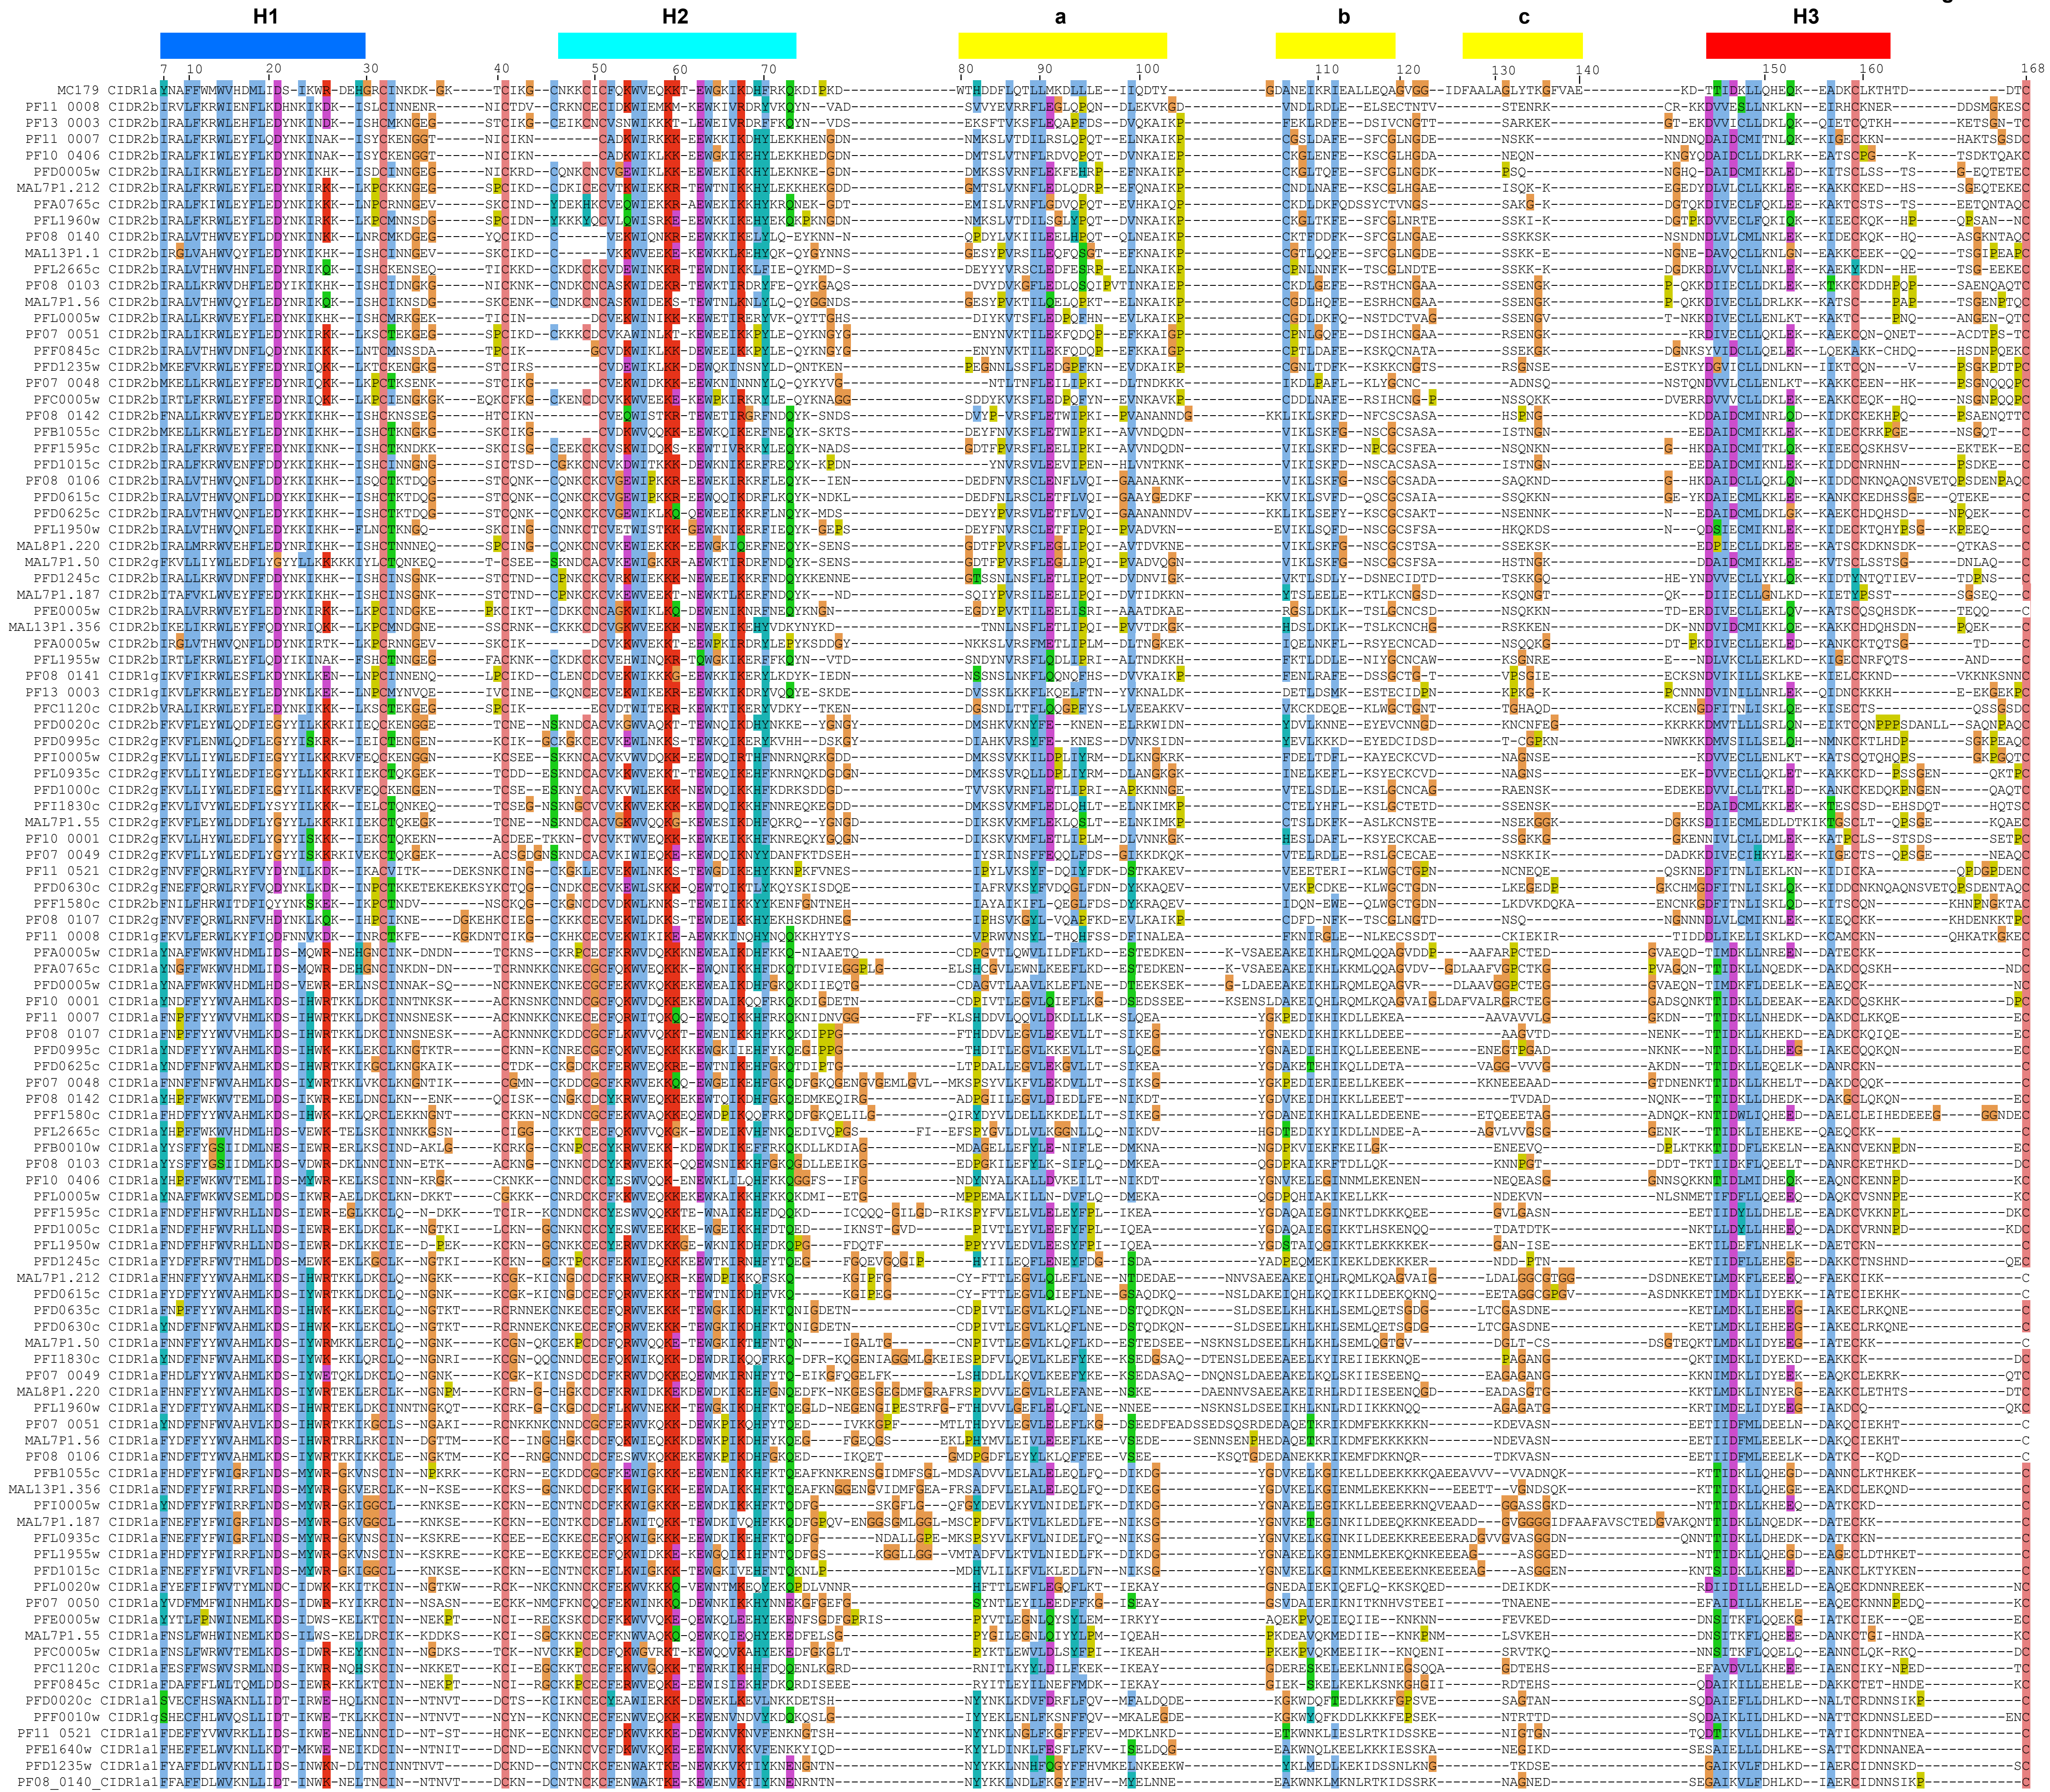

Supplement: ppat.1000147.s002.pdf [file ppat.1000147.s002.pdf]
