# Supplementary material for: The Cysteine-Rich Interdomain Region from the Highly Variable Plasmodium falciparum Erythrocyte Membrane Protein-1 Exhibits a Conserved Structure
Source: PubMed Central journal article supplement (PMC2518858; doi:10.1371/journal.ppat.1000147), 2008-09-05

Figure S3

H1

H2

a

b

c

H3

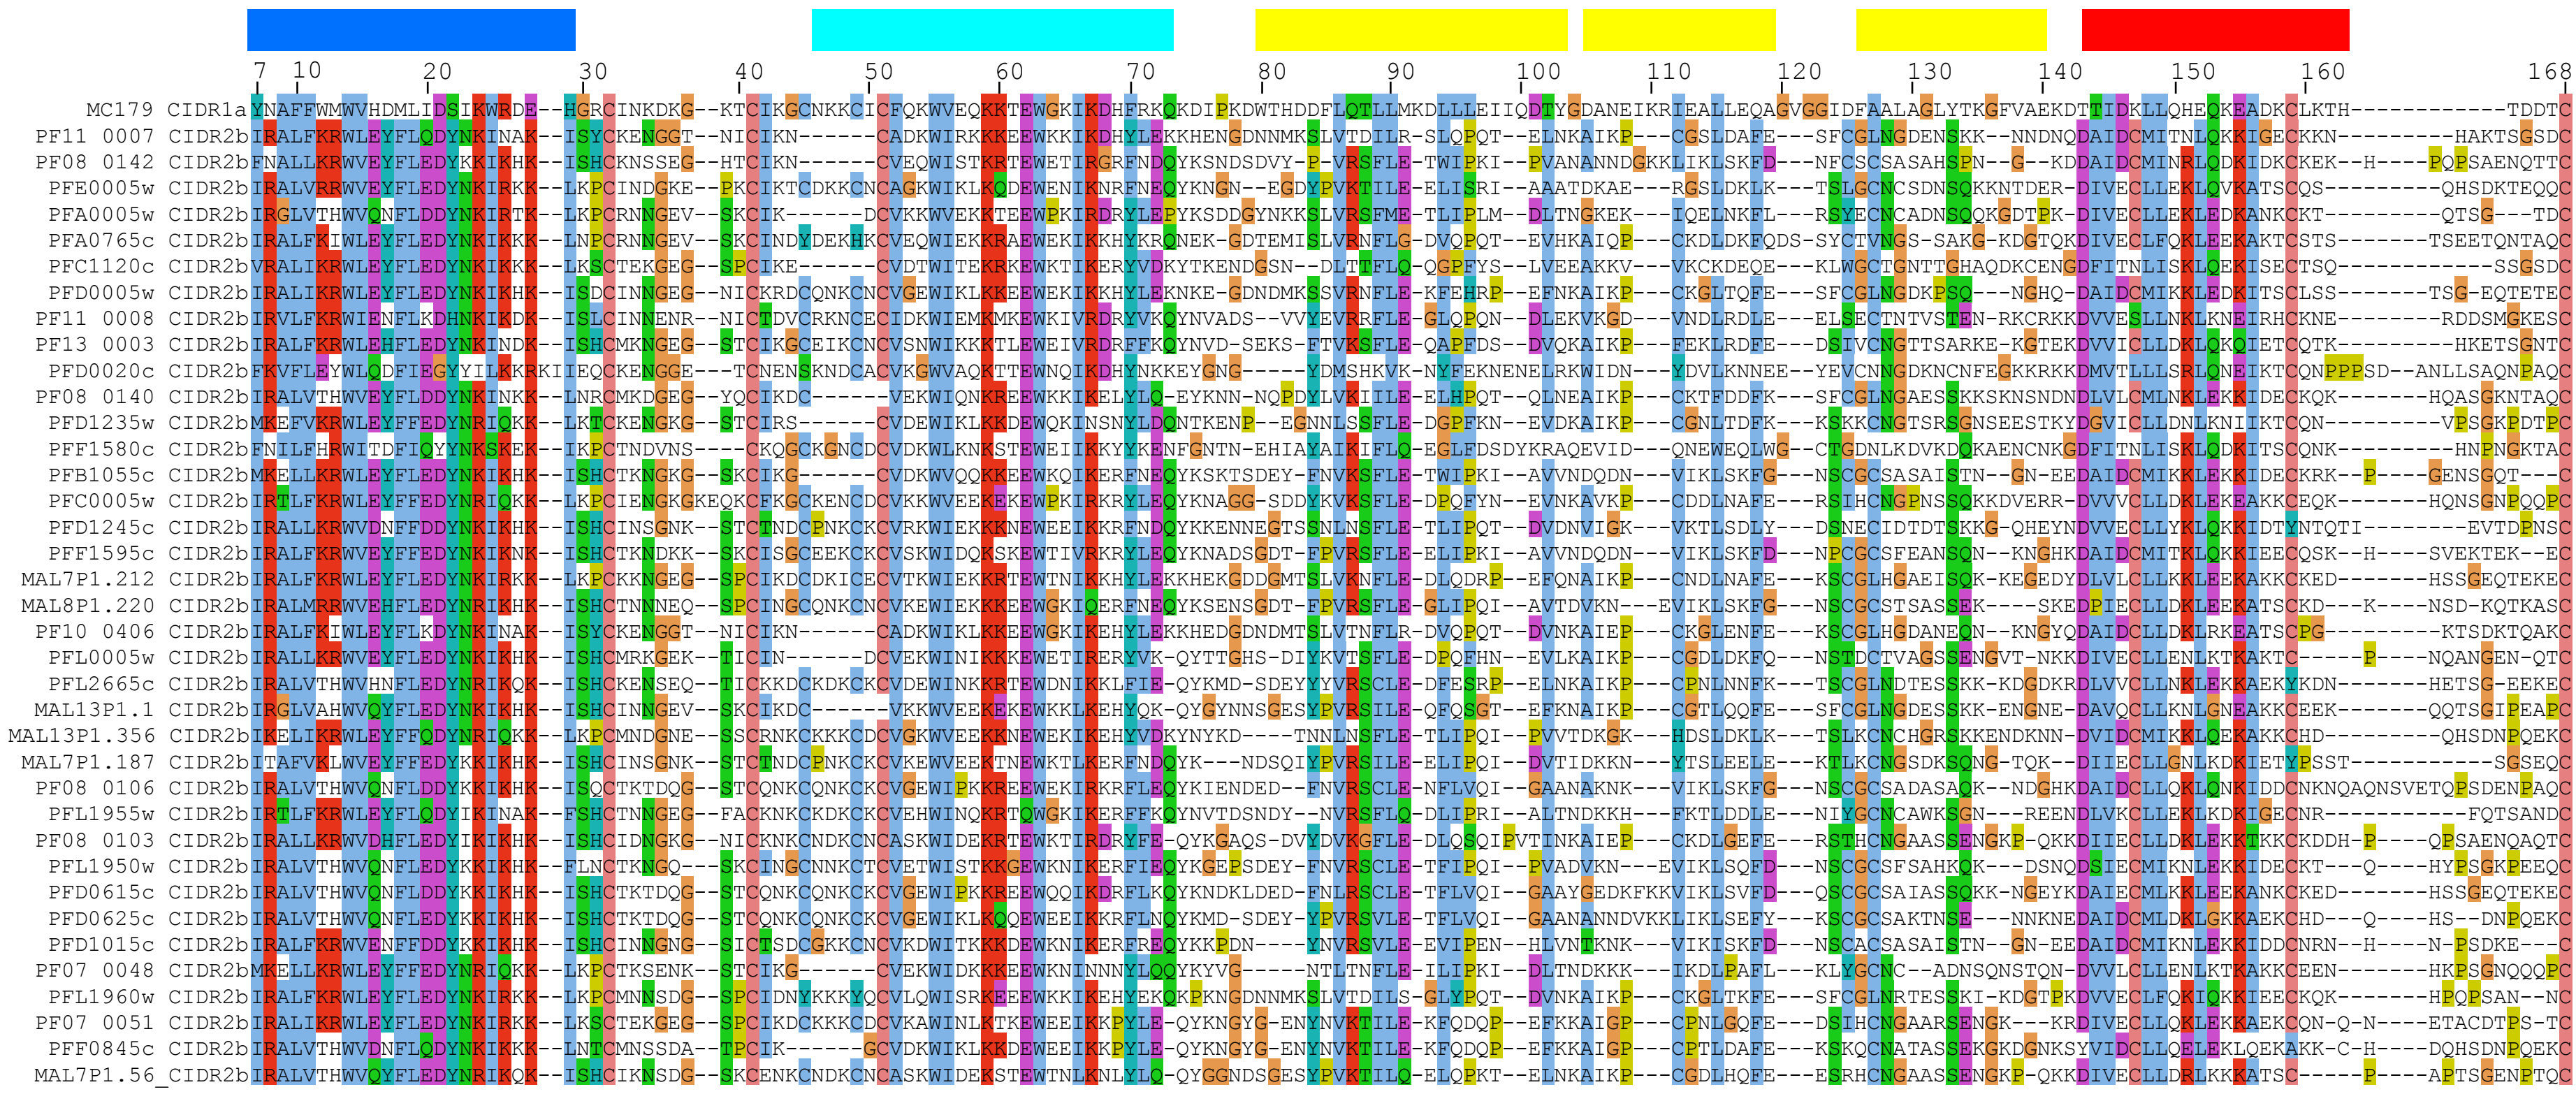

Supplement: ppat.1000147.s003.pdf [file ppat.1000147.s003.pdf]
